# Supplementary material
Source: Springer Nature journal article supplement (https://www.springermedizin.de/resource/supplementary/12998_2010_8_MOESM1_ESM.pdf/9680016)
Supplement: MOESM1 [file 9680016]

# Back-Related Leg Pain Study

**Telephone Screen**

**Baseline Visit 1 (2-2.5 Hours)**  
Study Description  
Vitals (blood pressure, height, weight)  
Questionnaire  
Physical Exam  
X-Ray, if needed

7-14 days

**Baseline Visit 2 (1.5 - 2 Hours)**  
Questionnaire  
Review Study  
Strength and Motion Testing

2-7 days

**Randomization & HEP 1 (1.5 - 2 Hours)**  
Review Study  
Random Treatment Assignment  
1<sup>st</sup> Home Exercise Session

**Home Exercise Program  
+  
Chiropractic Program  
n = 96**  
3 x 1 hr. instructional sessions  
AND  
20 min. chiropractic treatments  
(# to be determined)

**Home Exercise Program  
n = 96**  
3 x 1 hr. instructional sessions

**12 weeks  
of  
Treatment**

**Week 3 (1/2 - 1 hour)**  
Questionnaire

**Week 12 (1.5- 2 Hours)**  
Questionnaire  
Interview  
Strength and Motion testing  
Meet with Study Doctor

**1x per month phone call  
(8 months)**

**Follow up Questionnaires  
6 months (mailed)  
12 months (mailed)**
